# Supplementary material for: Synthesis and characterization of novel copper(ii) complexes as potential drug candidates against SARS-CoV-2 main protease
Source: Royal Society of Chemistry journal article supplement (doi:10.1039/d2nj00283c), 2022-01-01
Supplement: d2nj00283c1.pdf [file d2nj00283c1.pdf]

ARTICLE

**Supporting Information for  
Synthesis and characterization of novel copper (II) complexes as  
potential drug candidates against SARS CoV-2 main protease**

Sunil Kumar<sup>a</sup>, and Mukesh Choudhary<sup>a\*</sup>

---

<sup>a</sup> Department of Chemistry, National Institute of Technology Patna, Patna-800005  
(Bihar) India.

<sup>a,\*</sup>Corresponding author: [mukesh@nitp.ac.in](mailto:mukesh@nitp.ac.in)

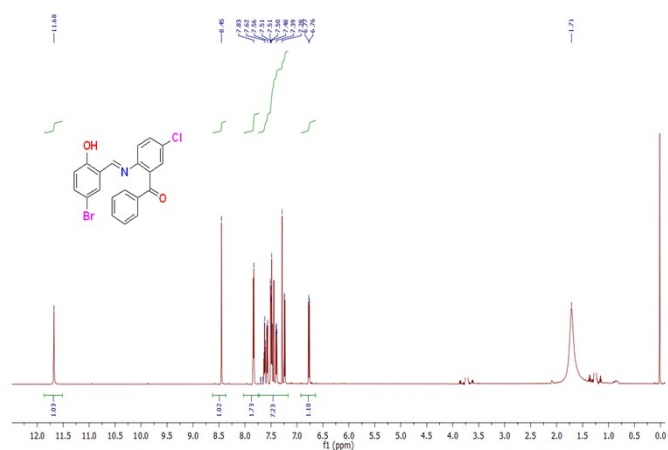Figure S1.  $^1\text{H-NMR}$  spectra of  $\text{L}^1\text{H}$  ligand.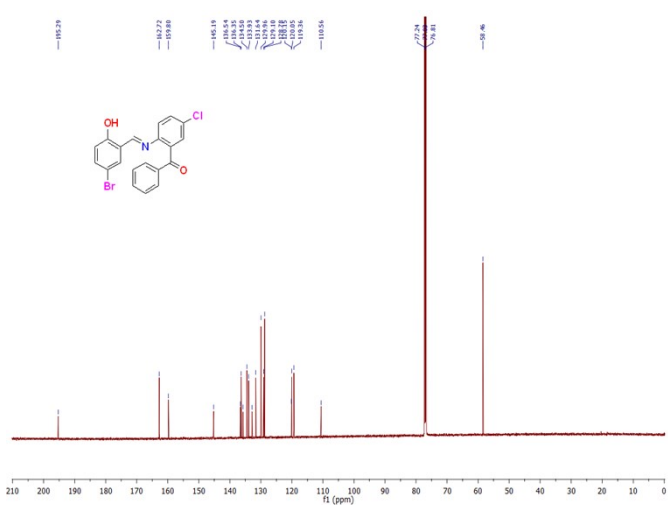Figure S2.  $^{13}\text{C-NMR}$  spectra of  $\text{L}^1\text{H}$  ligand.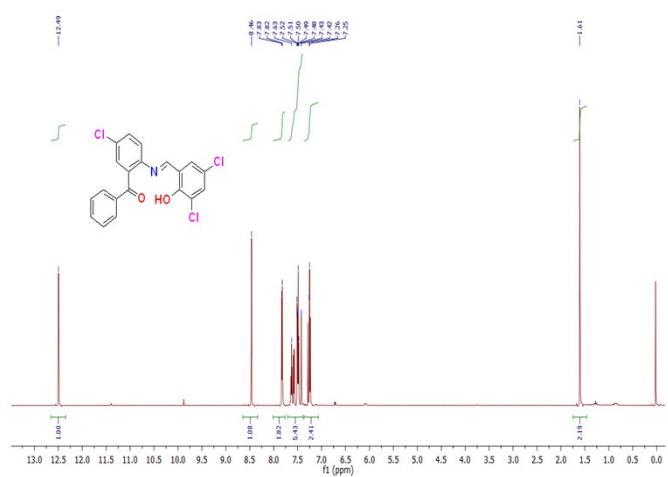Figure S3.  $^1\text{H-NMR}$  spectra of  $\text{L}^2\text{H}$  ligand.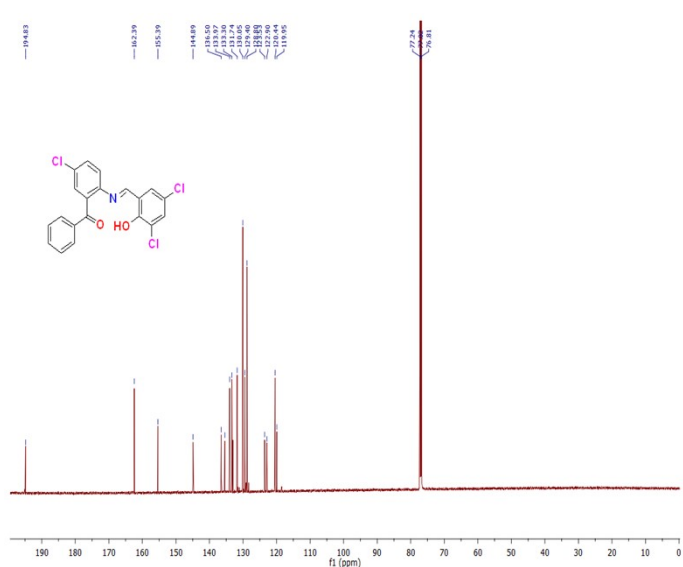Figure S4.  $^{13}\text{C-NMR}$  spectra of  $\text{L}^2\text{H}$  ligand.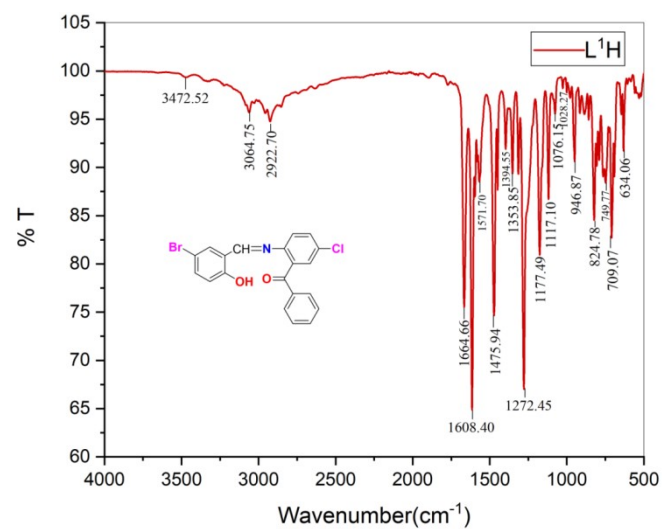Figure S5. IR spectra of  $\text{L}^1\text{H}$  ligand.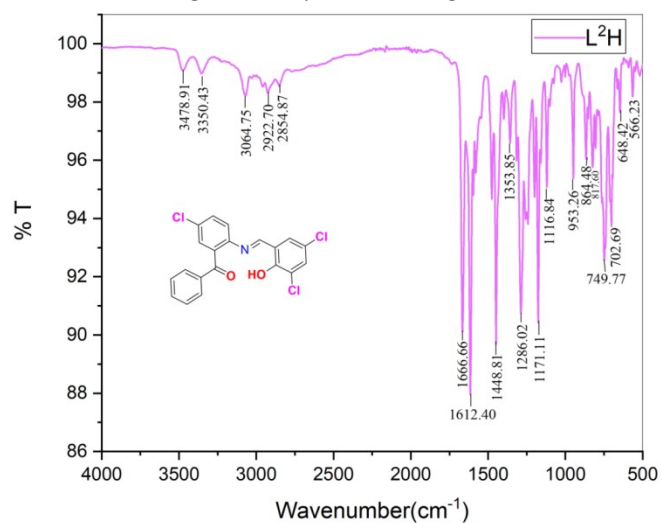Figure S6. IR spectra of  $\text{L}^2\text{H}$  ligand.

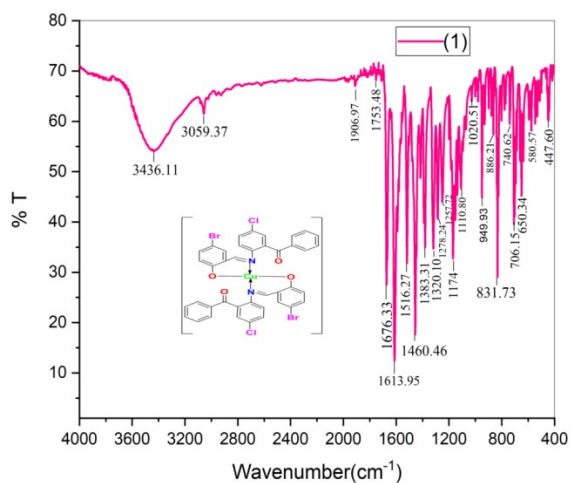

**Figure S7.** IR spectrum of copper(II) Schiff base complex  $[\text{Cu}(\text{L}^1)_2](1)$ .

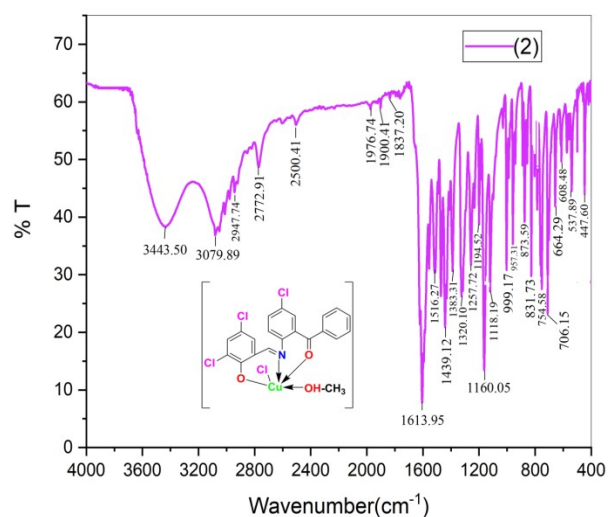

**S8.** IR spectrum of copper(II) Schiff base complex  $[\text{Cu}(\text{L}^2)(\text{CH}_3\text{OH})(\text{Cl})](2)$ .

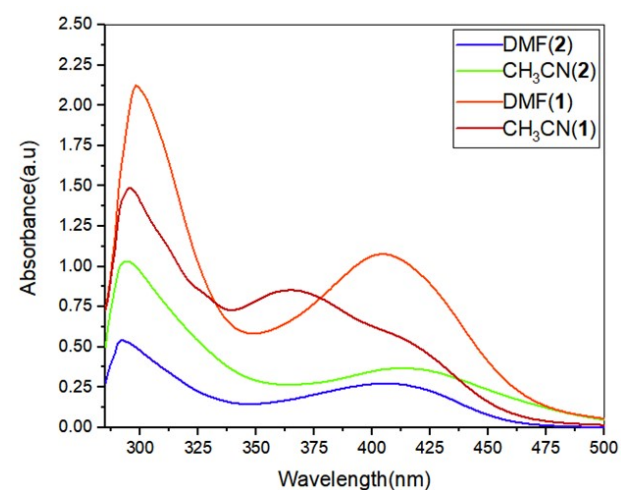

**Figure S9.** Electronic spectra ( $1 \times 10^{-3} \text{M}$ ) of copper (II) Schiff base complex  $[\text{Cu}(\text{L}^1)_2](1)$  and  $[\text{Cu}(\text{L}^2)(\text{CH}_3\text{OH})(\text{Cl})](2)$ .

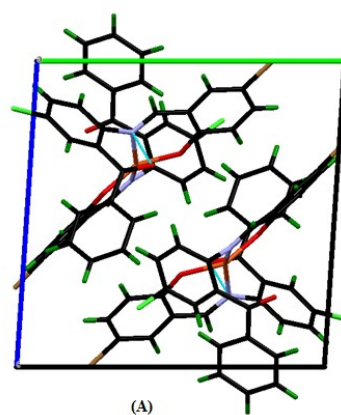

(A)

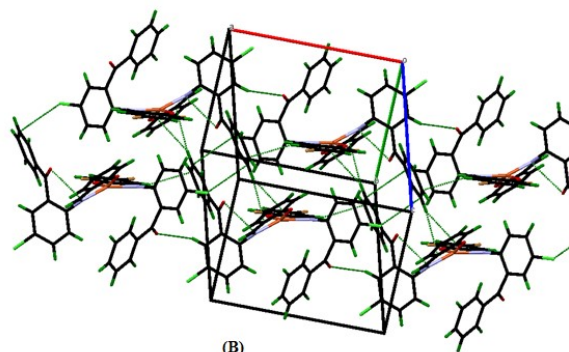

(B)

**Figure S10.** A packing views (A & B) of copper (II) complex  $[\text{Cu}(\text{L}^1)_2](1)$  (along the a-axis).

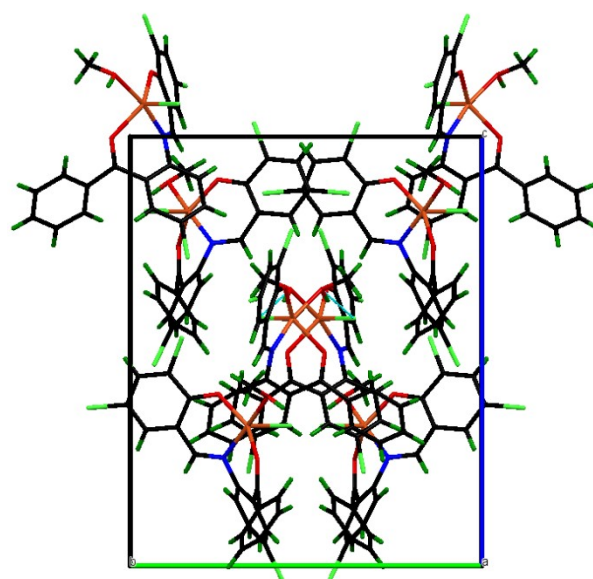

**Figure S11.** A packing view of copper (II) complex  $[\text{Cu}(\text{L}^2)(\text{CH}_3\text{OH})(\text{Cl})](2)$  (along the a-axis).

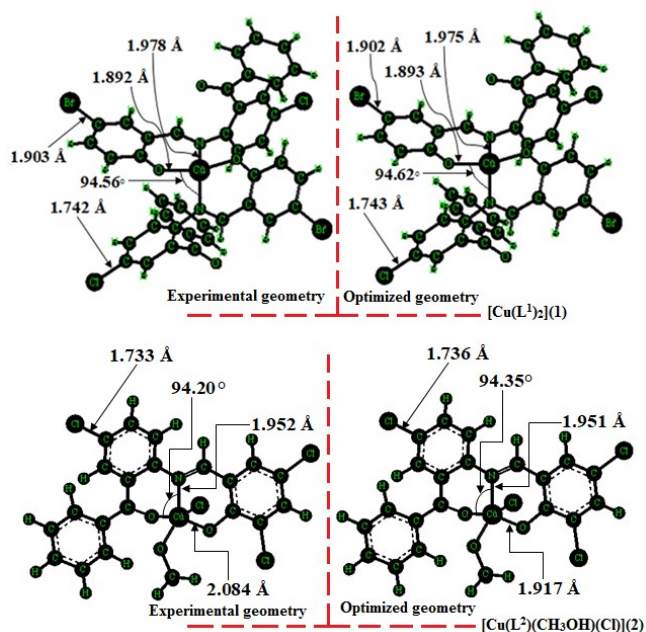

**Figure S12.** Experimental and optimized geometry of copper (II) complex  $[Cu(L^1)_2](1)$  and  $[Cu(L^2)(CH_3OH)(Cl)](2)$ .

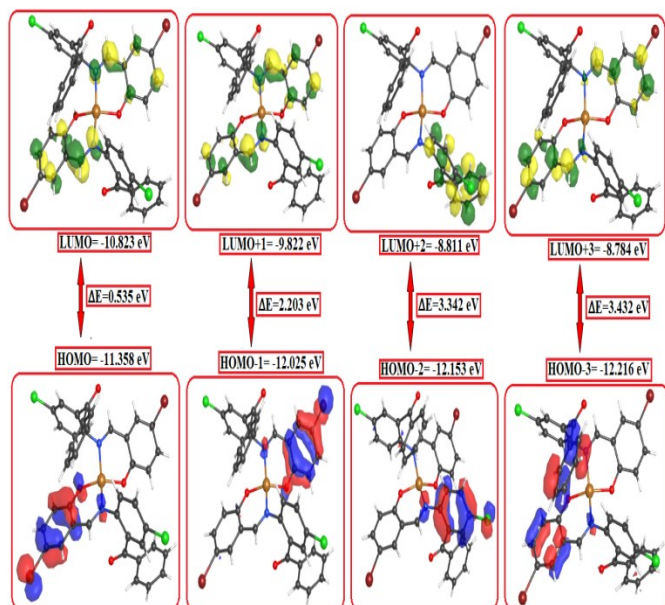

**Figure S13.** Frontier molecular orbitals of copper (II) Schiff base complex  $[Cu(L^1)_2](1)$ .

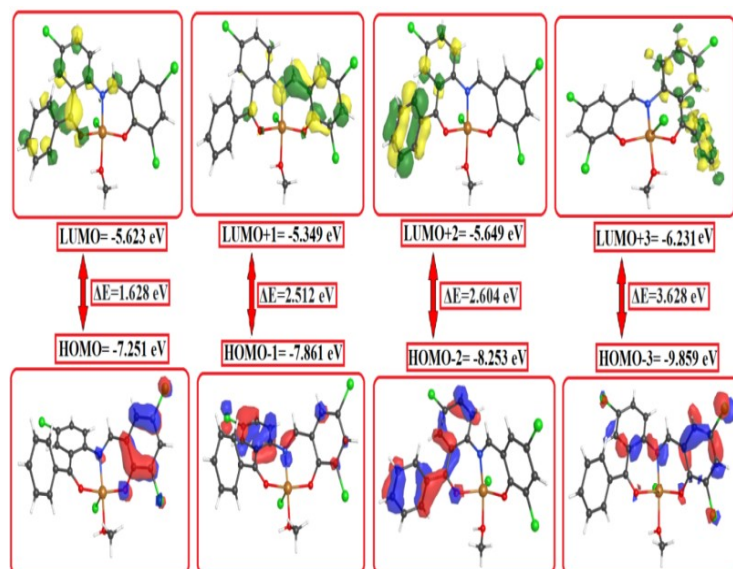

**Figure S14.** Frontier molecular orbital diagram of copper (II) complex  $[Cu(L^2)(CH_3OH)(Cl)](2)$ .

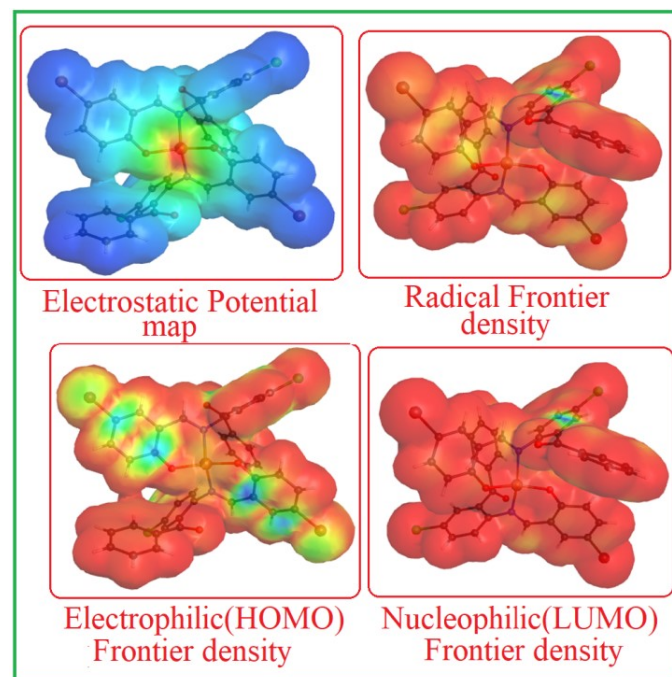

**Figure S15.** Electrostatic potential maps of copper (II) Schiff base complex  $[Cu(L^1)_2](1)$ .

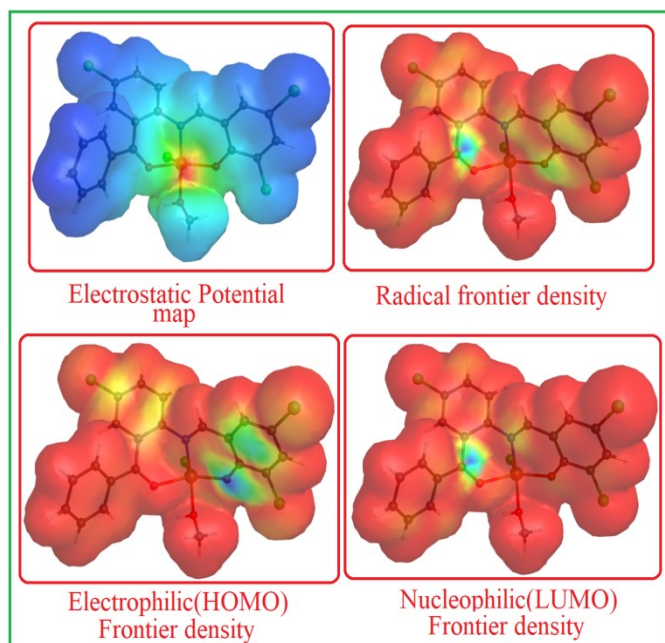

**Figure S16.** Electrostatic potential maps of copper (II) Schiff base complex  $[\text{Cu}(\text{L}^2)(\text{CH}_3\text{OH})(\text{Cl})](2)$ .

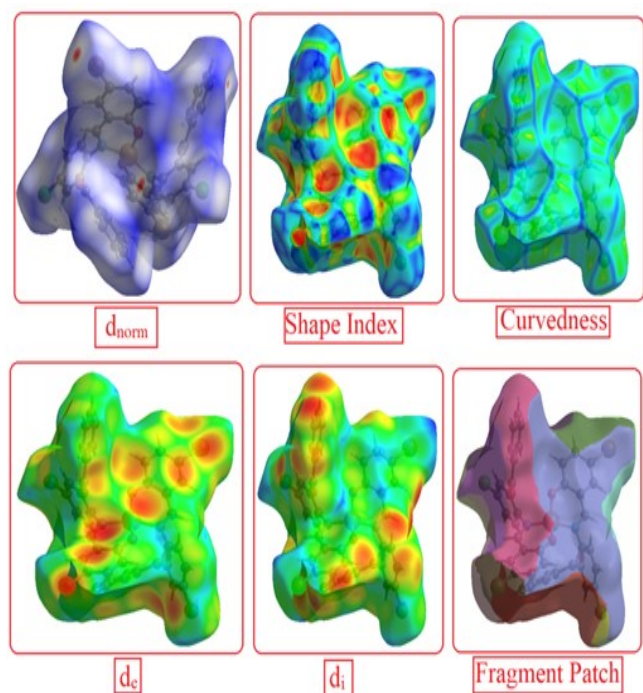

**Figure S17.** Graphical view of the Hirshfeld surfaces (full portion) mapped with  $d_{\text{norm}}$  property; red spots represents the closest contacts and blue color the most distant contacts for copper (II) Schiff base complex  $[\text{Cu}(\text{L}^1)_2](1)$ .

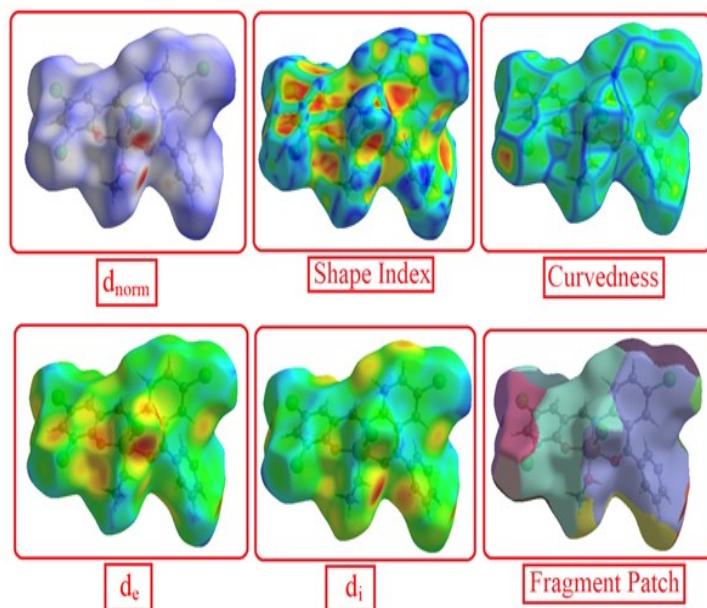

**Figure S18.** Graphical view of the Hirshfeld surfaces (full portion) mapped with  $d_{\text{norm}}$  property; red spots represents the closest contacts and blue color the most distant contacts for copper (II) Schiff base complex  $[\text{Cu}(\text{L}^2)(\text{CH}_3\text{OH})(\text{Cl})](2)$ .

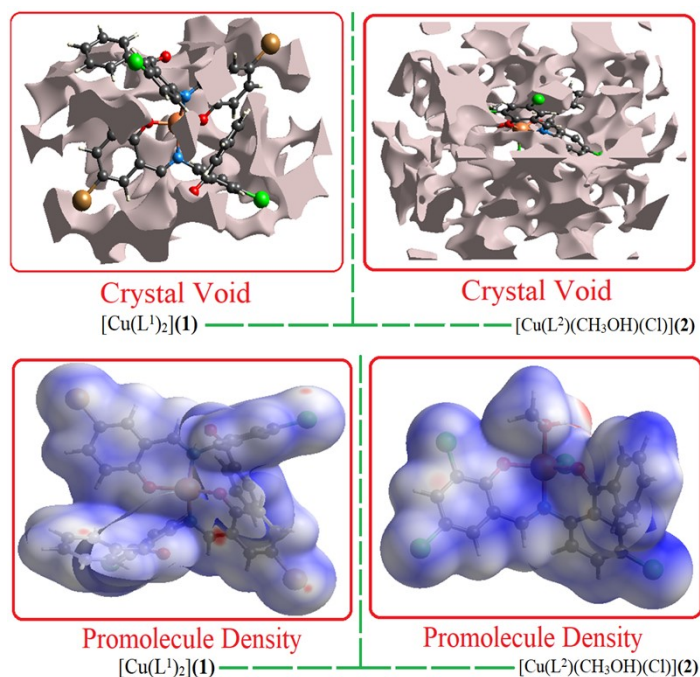

**Figure S19.** Crystal void and promolecule density surface of copper (II) Schiff base complex  $[\text{Cu}(\text{L}^1)_2](1)$  and  $[\text{Cu}(\text{L}^2)(\text{CH}_3\text{OH})(\text{Cl})](2)$ .

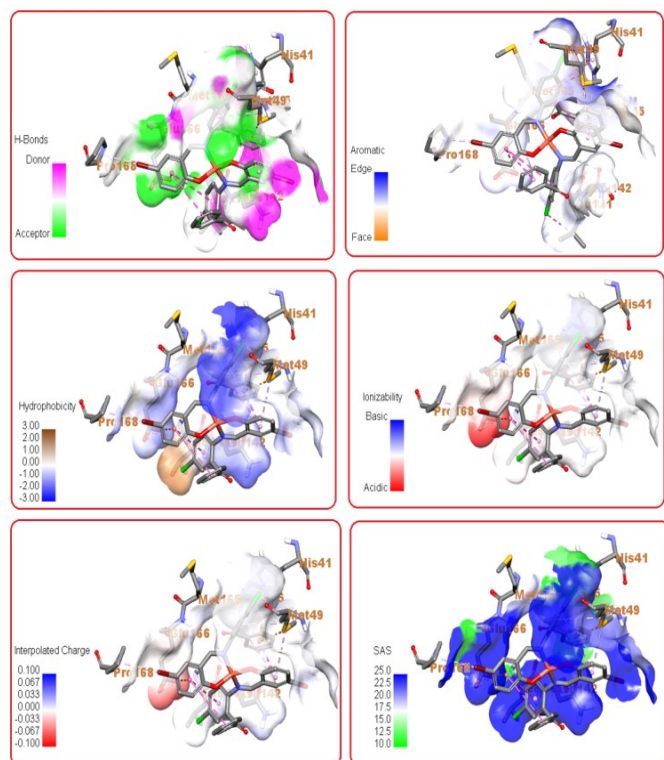

**Figure S20.** The representation of docked copper (II) complex  $[\text{Cu}(\text{L}^1)_2](1)$  inside the  $\text{MPr}^{\text{O}}$  protein (PDB ID: 7BRP) with its focused view for interacting residues along with H bond and intermolecular interactions; (a) H-bond donor and acceptor meshes represented by pink and light green colours, respectively; (b) Aromatic receptor surface represented by blue(Edge) and orange(face) colours; (c) Hydrophobic pocket represented with blue and brown colours; (d) ionizability receptor surface represented by blue (basic) and red (acidic) colours; (e) interpolated charge receptor surface represented by blue and red colours; (f) SAS receptor surface represented by blue and green colours, respectively.

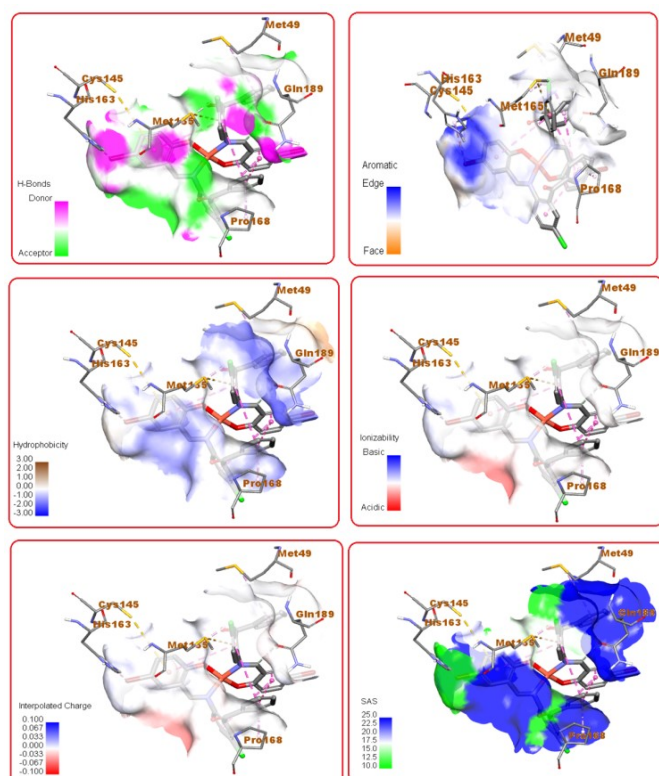

**Figure S21.** The representation of docked copper (II) complex  $[\text{Cu}(\text{L}^1)_2](1)$  inside the  $\text{MPr}^{\text{O}}$  protein (PDB ID: 7BUY) with its focused view for interacting residues along with H-bond and intermolecular interactions; (a) H-bond donor and acceptor meshes represented by pink and light green colours, respectively; (b) Aromatic receptor surface represented by blue(Edge) and orange (face) colours; (c) Hydrophobic pocket represented with blue and brown colours; (d) ionizability receptor surface represented by blue (basic) and red (acidic) colours; (e) interpolated charge receptor surface represented by blue and red colours; (f) SAS receptor surface represented by blue and light green colours, respectively.

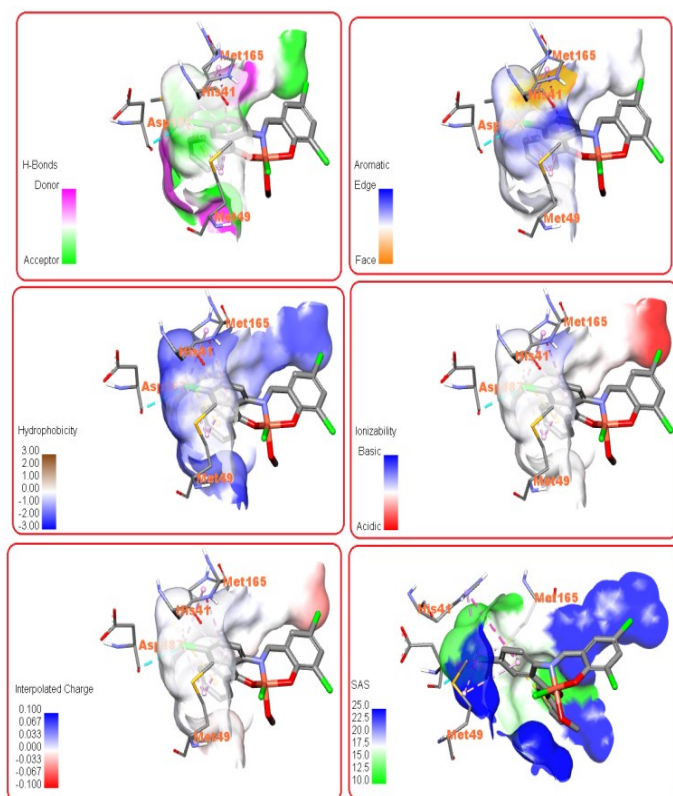

**Figure S22.** The representation of docked copper (II) complex  $[\text{Cu}(\text{L}^2)(\text{CH}_3\text{OH})(\text{Cl})](2)$  inside the  $\text{M}^{\text{PRO}}$  protein (PDB ID: 7BUY) with its focused view for interacting residues along with H bond and intermolecular interactions; (a) H-bond donor and acceptor meshes represented by pink and light green colors, respectively; (b) Aromatic receptor surface represented by blue(Edge) and orange(face) colours; (c) Hydrophobic pocket represented with blue and brown colours; (d) ionizability receptor surface represented by blue (basic) and red (acidic) colours; (e) interpolated charge receptor surface represented by blue and red colours; (f) SAS receptor surface represented by blue and light green colours, respectively.

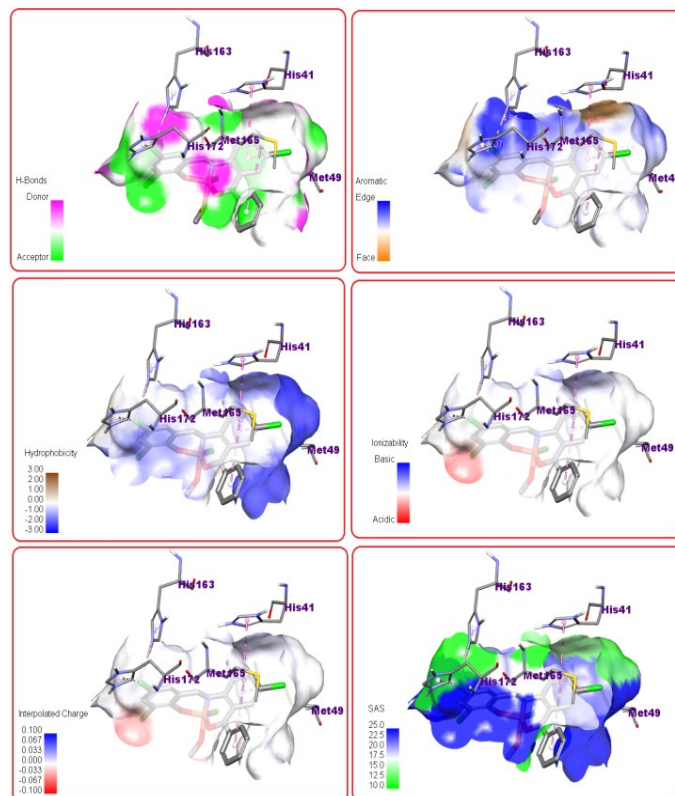

**Figure S23.** The representation of docked copper (II) complex  $[\text{Cu}(\text{L}^2)(\text{CH}_3\text{OH})(\text{Cl})](2)$  inside the  $\text{M}^{\text{PRO}}$  protein (PDB ID: 7BRP) with its focused view for interacting residues along with H bond and intermolecular interactions; (a) H-bond donor and acceptor meshes represented by pink and light green colours, respectively; (b) Aromatic receptor surface represented by blue(Edge) and orange(face) colours; (c) Hydrophobic pocket represented with blue and brown colours; (d) ionizability receptor surface represented by blue (basic) and red (acidic) colours; (e) interpolated charge receptor surface represented by blue and red colours; (f) SAS receptor surface represented by blue and light green colours, respectively.

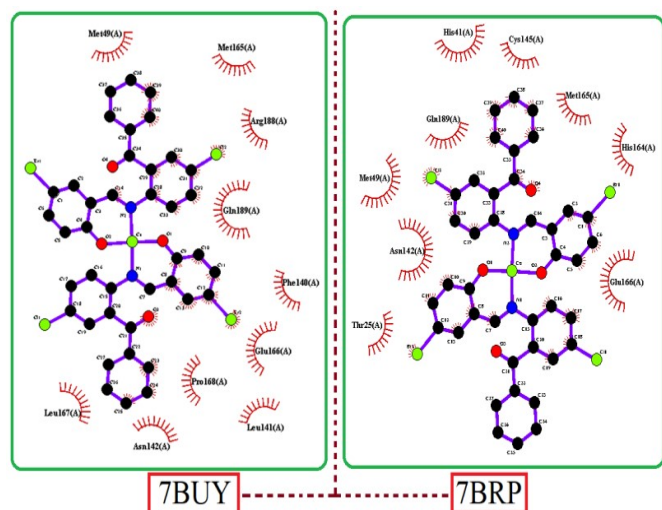

**Figure S24.** Two-dimensional Lig-plot image of complex  $[\text{Cu}(\text{L}^1)_2]$  (**1**) with SARS-CoV-2 main protease ( $\text{M}^{\text{pro}}$ - 7BUY and 7BRP).

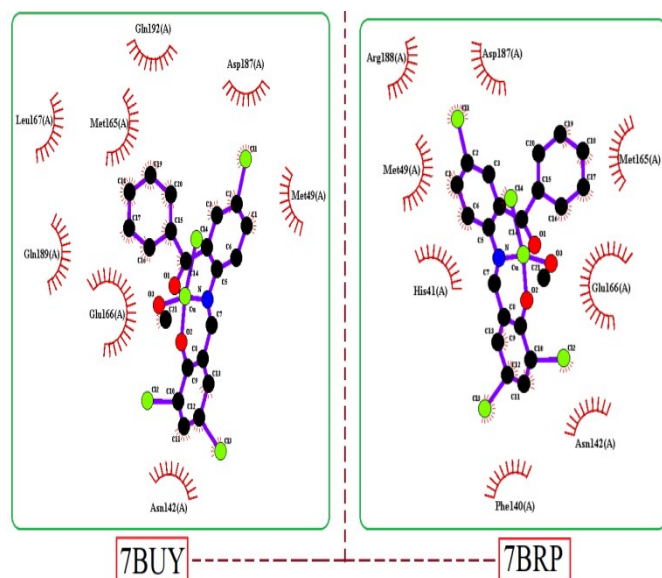

**Figure S25.** Two-dimensional Lig-plot image of the complex  $[\text{Cu}(\text{L}^2)(\text{CH}_3\text{OH})(\text{Cl})]$ (**2**) with SARS-CoV-2 main protease ( $\text{M}^{\text{pro}}$ - 7BUY and 7BRP).

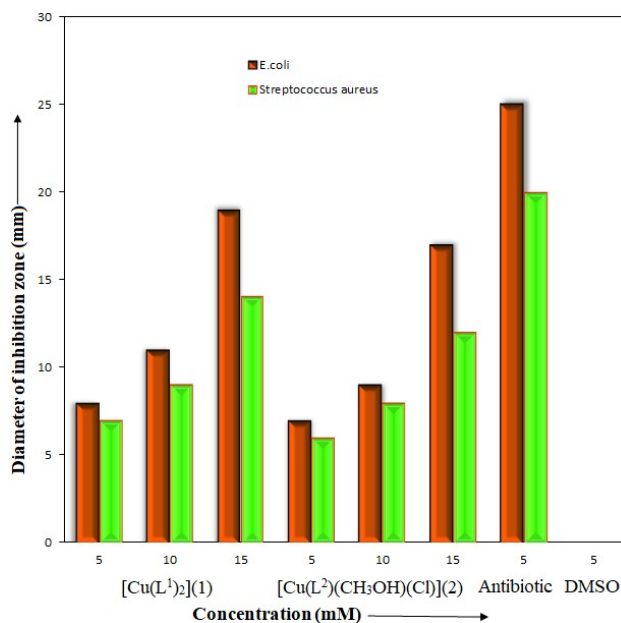

**Figure S26.** Graphical representation of antibacterial activity for the copper (II) Schiff base complex  $[\text{Cu}(\text{L}^1)_2]$  (**1**) and  $[\text{Cu}(\text{L}^2)(\text{CH}_3\text{OH})(\text{Cl})]$ (**2**).

**Table S1.** Hydrogen bonds for copper (II) Schiff base complex  $[\text{Cu}(\text{L}^1)_2]$ (**1**) and  $[\text{Cu}(\text{L}^2)(\text{CH}_3\text{OH})(\text{Cl})]$ (**2**) [Å and °].

| D-H...A               | d(D-H) | d(H...A) | d(D...A) | <(DHA) |
|-----------------------|--------|----------|----------|--------|
| <b>(1)</b>            |        |          |          |        |
| C(11)-H(11)...Br(1)#1 | 0.95   | 3.02     | 3.851(3) | 147.0  |
| C(29)-H(29)...Br(1)#2 | 0.95   | 3.07     | 3.960(3) | 157.2  |
| <b>(2)</b>            |        |          |          |        |
| C(14)-H(14)...O(2)#1  | 0.95   | 2.52     | 3.424(9) | 158.1  |
| O(3)-H(3A)...Cl(4)#2  | 0.84   | 2.20     | 3.018(5) | 163.3  |

Symmetry transformations used to generate equivalent atoms:

#1  $-x+1, -y+1, -z+2$  #2  $x, y+1, z$  for (**1**);

#1  $y-1/2, -x+1, z-1/4$  #2  $-x+1, -y+1, z$  for (**2**)



**Table S2.** The computed values of  $E_{\text{HOMO}}$ ,  $E_{\text{LUMO}}$  and energy gap ( $E_{\text{LUMO}} - E_{\text{HOMO}}$ )<sup>a</sup> for complex  $[\text{Cu}(\text{L}^1)_2](\mathbf{1})$  and  $[\text{Cu}(\text{L}^2)(\text{CH}_3\text{OH})(\text{Cl})](\mathbf{2})$ .

|                     | (1)     | (2)    |
|---------------------|---------|--------|
| $E_{\text{HOMO}}$   | -11.358 | -7.251 |
| $E_{\text{LUMO}}$   | -10.823 | -5.623 |
| $\Delta E$          | 0.535   | 1.628  |
| $E_{\text{HOMO}-1}$ | -12.025 | -7.861 |
| $E_{\text{LUMO}+1}$ | -9.822  | -5.349 |
| $\Delta E$          | 2.203   | 2.512  |
| $E_{\text{HOMO}-2}$ | -12.153 | -8.253 |
| $E_{\text{LUMO}+2}$ | -8.811  | -5.649 |
| $\Delta E$          | 3.342   | 2.604  |

<sup>a</sup> Energy gap ( $\Delta E$ ) =  $E_{\text{LUMO}} - E_{\text{HOMO}}$ ; units in eV.

**Table S3.** Computed values for Global reactivity descriptors of the studied complex  $[\text{Cu}(\text{L}^1)_2](\mathbf{1})$  and  $[\text{Cu}(\text{L}^2)(\text{CH}_3\text{OH})(\text{Cl})](\mathbf{2})$ .

|          | (1)     | (2)    |
|----------|---------|--------|
| IP       | 11.358  | 7.251  |
| EA       | 10.823  | 5.623  |
| $\chi$   | 11.091  | 6.437  |
| $\eta$   | 0.634   | 0.407  |
| $\mu$    | -11.091 | -6.437 |
| $\omega$ | 97.011  | 50.903 |
| $\sigma$ | 0.789   | 1.229  |

IP= ionization potential, EA= electron affinity,  $\chi$ = electro negativity,  $\mu$ =chemical potential,  $\eta$  = global hardness,  $\sigma$ =global softness and  $\omega$ = global electrophilicity; units in eV.

**Table S4.** Interaction energies for complex  $[\text{Cu}(\text{L}^1)_2](\mathbf{1})$  calculated with CE-B3LYP model. It can be seen from the interaction energies that the hydrogen bonding motif between the central molecules (highlighted in yellow mesh) and the  $-x +1/2, y +1/2, z +1/2$  symmetry-related molecule (line green) is by far the strongest interaction among near neighbours, with interaction energy of  $-41.2 \text{ kJ mol}^{-1}$ .

| Complex $[\text{Cu}(\text{L}^1)_2](\mathbf{1})$  |   |            |       |                  |       |       |        |       |       |
|--------------------------------------------------|---|------------|-------|------------------|-------|-------|--------|-------|-------|
|                                                  | N | Symop      | R     | Electron Density | E_ele | E_pol | E_dis  | E_rep | E_tot |
|                                                  | 2 | x, y, z    | 11.18 | HF/3-21G         | -11.9 | -4.2  | -52.6  | 23.0  | -43.7 |
|                                                  | 1 | -x, -y, -z | 6.96  | HF/3-21G         | -27.7 | -10.1 | -111.7 | 52.3  | -93.0 |
|                                                  | 2 | x, y, z    | 12.55 | HF/3-21G         | 0.0   | -1.1  | 0.0    | 0.0   | -0.7  |
|                                                  | 1 | -x, -y, -z | 10.07 | HF/3-21G         | -23.0 | -6.6  | -112.3 | 65.8  | -75.5 |
|                                                  | 2 | x, y, z    | 12.54 | HF/3-21G         | 0.0   | -0.9  | 0.0    | 0.0   | -0.6  |
|                                                  | 1 | -x, -y, -z | 10.54 | HF/3-21G         | -16.7 | -5.5  | -57.0  | 30.6  | -47.1 |
|                                                  | 1 | -x, -y, -z | 12.26 | HF/3-21G         | 0.0   | -3.2  | 0.0    | 0.0   | -2.1  |
|                                                  | 1 | -x, -y, -z | 10.25 | HF/3-21G         | -20.5 | -5.2  | -95.5  | 58.7  | -62.7 |
|                                                  | 1 | -x, -y, -z | 11.49 | HF/3-21G         | -7.3  | -2.5  | -44.1  | 21.3  | -31.5 |
|                                                  | 1 | -x, -y, -z | 12.35 | HF/3-21G         | 0.0   | -1.9  | 0.0    | 0.0   | -1.3  |
|                                                  | 1 | -x, -y, -z | 11.81 | HF/3-21G         | -1.6  | -2.3  | -15.2  | 5.1   | -12.7 |
| Energy Model                                     |   |            |       |                  | k_ele | k_pol | k_disp | k_rep |       |
| CE-HF ... HF/3-21G electron densities            |   |            |       |                  | 1.019 | 0.651 | 0.901  | 0.811 |       |
| CE-B3LYP ... B3LYP/6-31G(d,p) electron densities |   |            |       |                  | 1.057 | 0.740 | 0.871  | 0.618 |       |

**Table S5.** Interaction energies for complex  $[\text{Cu}(\text{L}^2)(\text{CH}_3\text{OH})(\text{Cl})](\mathbf{2})$  calculated with CE-B3LYP model. It can be seen from the interaction energies table that the hydrogen bonding motif between the central molecules (highlighted in yellow mesh) and the  $-x +1/2, y +1/2, z +1/2$  symmetry-related molecule (line green) is by far the strongest interaction among near neighbors, with interaction energy of  $-44.6 \text{ kJ mol}^{-1}$ .

| Complex $[\text{Cu}(\text{L}^2)(\text{CH}_3\text{OH})(\text{Cl})](\mathbf{2})$ |   |                       |       |                  |        |       |        |       |        |
|--------------------------------------------------------------------------------|---|-----------------------|-------|------------------|--------|-------|--------|-------|--------|
|                                                                                | N | Symop                 | R     | Electron Density | E_ele  | E_pol | E_dis  | E_rep | E_tot  |
|                                                                                | 1 | -x, -y, z             | 8.45  | HF/3-21G         | -8.4   | -2.6  | -47.3  | 25.3  | -32.3  |
|                                                                                | 2 | x+1/2, y+1/2, z+1/2   | 14.30 | HF/3-21G         | 0.0    | -1.8  | 0.0    | 0.0   | -1.2   |
|                                                                                | 2 | -y, x+1/2, z+1/4      | 13.78 | HF/3-21G         | 0.0    | -0.5  | 0.0    | 0.0   | -0.3   |
|                                                                                | 2 | y+1/2, -x, z+3/4      | 6.51  | HF/3-21G         | -60.7  | -38.0 | -67.9  | 46.0  | -110.4 |
|                                                                                | 2 | -x+1/2, -y+1/2, z+1/2 | 12.95 | HF/3-21G         | 0.0    | -1.9  | 0.0    | 0.0   | -1.2   |
|                                                                                | 1 | -x, -y, z             | 7.08  | HF/3-21G         | -183.6 | -71.7 | -76.0  | 150.3 | -180.3 |
|                                                                                | 2 | -y, x+1/2, z+1/4      | 14.73 | HF/3-21G         | 0.0    | -0.4  | 0.0    | 0.0   | -0.2   |
|                                                                                | 2 | -x+1/2, -y+1/2, z+1/2 | 11.34 | HF/3-21G         | -12.9  | -2.1  | -14.1  | 6.9   | -21.6  |
|                                                                                | 2 | -y+1/2, x, z+3/4      | 7.87  | HF/3-21G         | 8.6    | -6.2  | -33.2  | 13.5  | -14.2  |
| Energy Model                                                                   |   |                       |       |                  | k_ele  | k_pol | k_disp | k_rep |        |
| CE-HF ... HF/3-21G electron densities                                          |   |                       |       |                  | 1.019  | 0.651 | 0.901  | 0.811 |        |
| CE-B3LYP ... B3LYP/6-31G(d,p) electron densities                               |   |                       |       |                  | 1.057  | 0.740 | 0.871  | 0.618 |        |

**Table S6.** The structure activity relationship established between the structures and their potential applications against SARS-CoV-2 main protease(M<sup>Pro</sup>) of the copper complex(II) [Cu(L<sup>1</sup>)<sub>2</sub>](**1**) and [Cu(L<sup>2</sup>)(CH<sub>3</sub>OH)(Cl)] (**2**).

| Complexes  |      | Experimental bond lengths (Å) |        | Docked complex inside SARS-CoV-2 bond lengths (Å) |        |
|------------|------|-------------------------------|--------|---------------------------------------------------|--------|
| <b>(1)</b> | 7BUY | Cu(1)-O(1)                    | 1.8926 | Cu(1)-O(1)                                        | 1.8931 |
|            |      | Cu(1)-O(3)                    | 1.8898 | Cu(1)-O(3)                                        | 1.8902 |
|            |      | Cu(1)-N(1)                    | 1.9738 | Cu(1)-N(1)                                        | 1.9751 |
|            |      | Cu(1)-N(2)                    | 1.9784 | Cu(1)-N(2)                                        | 1.9772 |
|            | 7BRP | Cu(1)-O(1)                    | 1.8926 | Cu(1)-O(1)                                        | 1.8927 |
|            |      | Cu(1)-O(3)                    | 1.8898 | Cu(1)-O(3)                                        | 1.8899 |
|            |      | Cu(1)-N(1)                    | 1.9738 | Cu(1)-N(1)                                        | 1.9732 |
|            |      | Cu(1)-N(2)                    | 1.9784 | Cu(1)-N(2)                                        | 1.9779 |
| <b>(2)</b> | 7BUY | Cu(1)-O(1)                    | 2.084  | Cu(1)-O(1)                                        | 2.016  |
|            |      | Cu(1)-O(2)                    | 1.917  | Cu(1)-O(2)                                        | 1.918  |
|            |      | Cu(1)-O(3)                    | 1.993  | Cu(1)-O(3)                                        | 1.994  |
|            |      | Cu(1)-N(1)                    | 1.952  | Cu(1)-N(1)                                        | 1.954  |
|            | 7BRP | Cu(1)-O(1)                    | 2.084  | Cu(1)-O(1)                                        | 2.082  |
|            |      | Cu(1)-O(2)                    | 1.917  | Cu(1)-O(2)                                        | 1.915  |
|            |      | Cu(1)-O(3)                    | 1.993  | Cu(1)-O(3)                                        | 1.995  |
|            |      | Cu(1)-N(1)                    | 1.952  | Cu(1)-N(1)                                        | 1.954  |

**Table S7.** Antibacterial screening activity of the copper(II) complex [Cu(L<sup>1</sup>)<sub>2</sub>](**1**) and [Cu(L<sup>2</sup>)(CH<sub>3</sub>OH)(Cl)] (**2**).

| Complexes (mM) | Diameter of inhibition zone (in mm) |                  |
|----------------|-------------------------------------|------------------|
|                | <i>E. coli</i>                      | <i>S. aureus</i> |
| <b>(1)</b>     |                                     |                  |
| 5              | 8                                   | 7                |
| 10             | 11                                  | 9                |
| 15             | 19                                  | 14               |
| <b>(2)</b>     |                                     |                  |
| 5              | 7                                   | 6                |
| 10             | 9                                   | 8                |
| 15             | 17                                  | 12               |
| Antibiotic     |                                     |                  |
| 5              | 25                                  | 20               |
| DMSO           |                                     |                  |
| 5              | 0                                   | 0                |

Note: Key to interpretation (5-15mM): less than 8 mm, inactive; 9-13 mm, moderately active; above 14 mm, highly active. DMSO (control) shows not clear inhibition zone. Each value is observed within the estimated error limits of ±1 mM.
